# Supplementary material for: Ni(ii) complexes bearing pyrrolide-imine ligands with pendant N-, O- and S-donor groups: synthesis, structural characterization and use in ethylene oligomerization
Source: Royal Society of Chemistry journal article supplement (doi:10.1039/c5ra16782e), 2015-01-01
Supplement: c5ra16782e1.pdf [file c5ra16782e1.pdf]

Electronic Supplementary Information for

**Ni(II) Complexes Bearing Pyrrolide-Imine Ligands with Pendant O- and S-donor Groups: Synthesis, Structural Characterization and use in Ethylene Oligomerization**

A. C. Pinheiro,<sup>a</sup> A. H. Virgili,<sup>a</sup> Thierry Roisnel,<sup>b</sup> Evgueny Kirillov,<sup>c</sup> Jean-François Carpentier<sup>c,\*</sup> and Osvaldo de L. Casagrande Jr.<sup>a,\*</sup>

<sup>a</sup> *Laboratório de Catálise Molecular, Instituto de Química, Universidade Federal do Rio Grande do Sul, Av. Bento Gonçalves, 9500, Porto Alegre, RS 90501-970, Brazil*

<sup>b</sup> *Institut des Sciences Chimiques de Rennes, Centre de diffraction X, UMR 6226 CNRS-Université de Rennes 1, F-35042 Rennes Cedex, France*

<sup>c</sup> *Institut des Sciences Chimiques de Rennes, Organometallics: Materials and Catalysis Dept., UMR 6226 CNRS-Université de Rennes 1, F-35042 Rennes Cedex, France*

---

\* Corresponding authors: E-mail: [jean-francois.carpentier@univ-rennes1.fr](mailto:jean-francois.carpentier@univ-rennes1.fr),  
[osvaldo.casagrande@ufrgs.br](mailto:osvaldo.casagrande@ufrgs.br)

S1. Table of crystallographic data for **Ni1**.

|                                                                         | <b>Ni1</b>                                                        |
|-------------------------------------------------------------------------|-------------------------------------------------------------------|
| Formula                                                                 | C <sub>13</sub> H <sub>14</sub> ClN <sub>3</sub> Ni               |
| CCDC                                                                    | 1407832                                                           |
| Mol. wt.                                                                | 306.43                                                            |
| Crystal System                                                          | Monoclinic                                                        |
| Space group                                                             | P2 <sub>1</sub> /C                                                |
| <i>a</i> (Å)                                                            | 7.8815(2)                                                         |
| <i>b</i> (Å)                                                            | 18.8766(5)                                                        |
| <i>c</i> (Å)                                                            | 8.5933(2)                                                         |
| $\alpha$ (°)                                                            | 90                                                                |
| $\beta$ (°)                                                             | 95.4990(10)                                                       |
| $\gamma$ (°)                                                            | 90                                                                |
| <i>V</i> (Å <sup>3</sup> )                                              | 1272.59(6)                                                        |
| <i>Z</i>                                                                | 4                                                                 |
| Density (g/cm <sup>3</sup> )                                            | 1.599                                                             |
| Abs. Coeff., (mm <sup>-1</sup> )                                        | 1.718                                                             |
| <i>F</i> (000)                                                          | 632                                                               |
| Crystal size, (mm)                                                      | 0.19 x 0.16 x 0.06                                                |
| $\theta$ range, deg                                                     | 3.21 to 27.48                                                     |
| Limiting indices                                                        | -10 ≤ <i>h</i> ≤ 10<br>-24 ≤ <i>k</i> ≤ 17<br>-11 ≤ <i>l</i> ≤ 11 |
| Reflections collected/independent [ <i>R</i> <sub>(int)</sub> ]         | 19895 / 2907<br>[ <i>R</i> (int) = 0.0359]                        |
| Reflections [ <i>I</i> > 2 $\sigma$ ]                                   | 2526                                                              |
| Completeness to $\theta$ (%)                                            | 99.7                                                              |
| Absorption correction type                                              | Multi-scan                                                        |
| Max. and min. transmission                                              | 0.902 , 0.807                                                     |
| Data/ restraints/para.                                                  | 2907 / 0 / 166                                                    |
| Goodness-of-fit                                                         | 1.031                                                             |
| <i>R</i> <sub>1</sub> [ <i>I</i> > 2 $\sigma$ ( <i>I</i> )] (all data)  | 0.024                                                             |
| <i>wR</i> <sub>2</sub> [ <i>I</i> > 2 $\sigma$ ( <i>I</i> )] (all data) | 0.0565                                                            |
| Largest diff. (e·Å <sup>-3</sup> )                                      | 0.323 and -0.24                                                   |

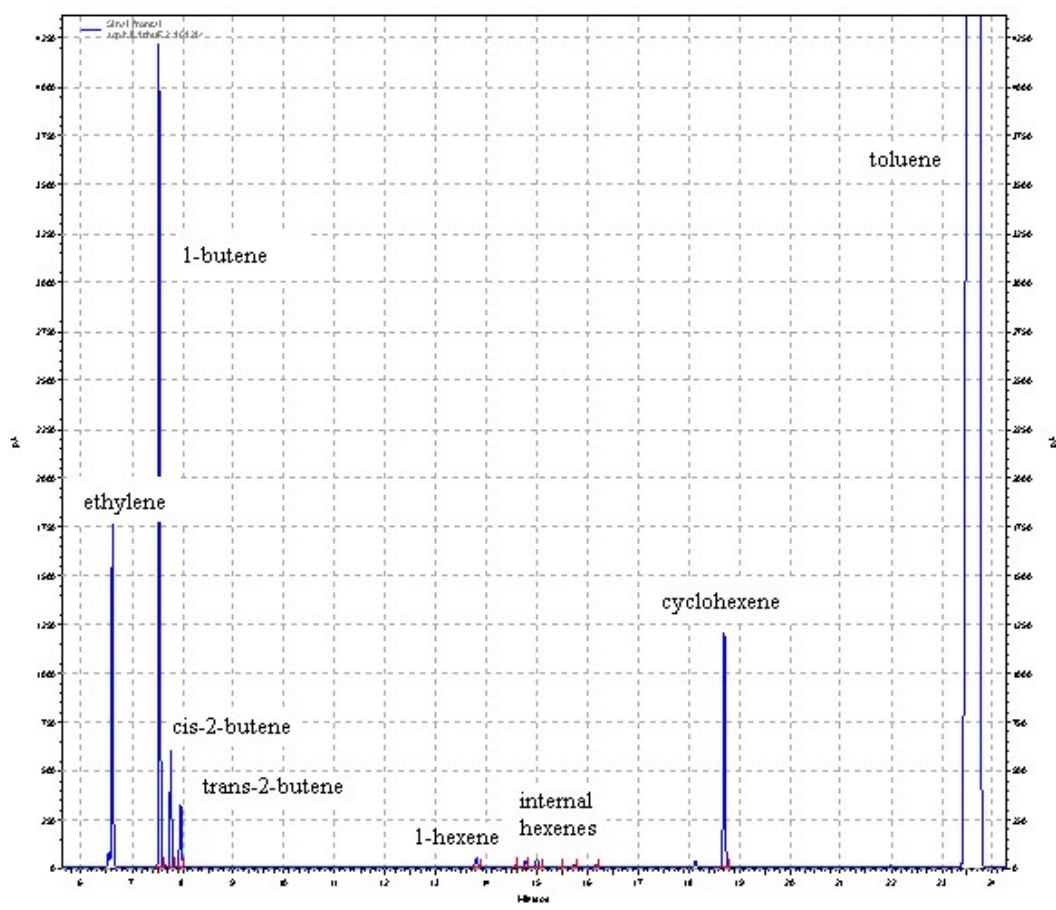

**Fi**

Figure S1. Typical GC trace for the toluene soluble fraction using Ni<sub>2</sub>/MAO (Table 1, entry 2, [Al]/[Ni] = 250, oligomerization time = 20 min, P(ethylene) = 20 bar, T = 30°C).

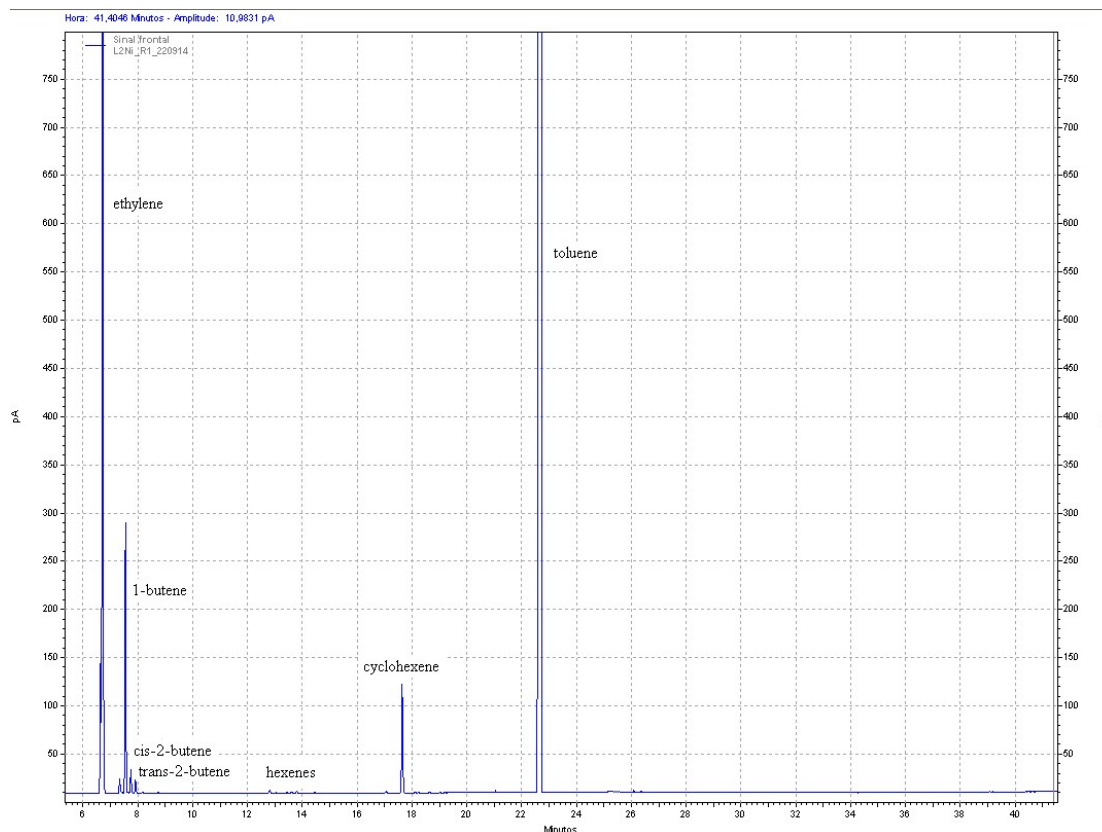

**Figure S2.** Typical GC trace for the toluene soluble fraction using Ni3/MAO (Table 1, entry 3, [Al]/[Ni] = 250, oligomerization time = 20 min, P(ethylene) = 20 bar, T = 30°C).

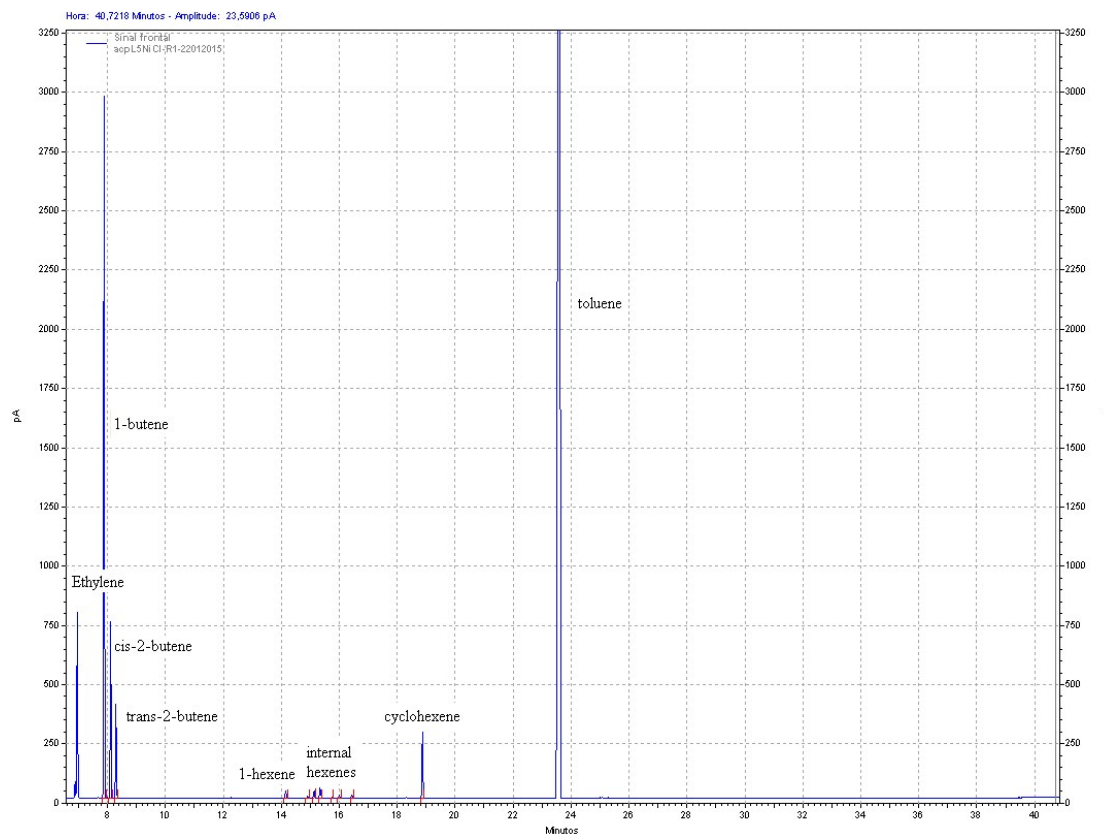

**Figure S3.** Typical GC trace for the toluene soluble fraction using Ni5/MAO (Table 1, entry 5,  $[Al]/[Ni] = 250$ , oligomerization time = 20 min,  $P(\text{ethylene}) = 20$  bar,  $T = 30^\circ\text{C}$ ).
